# Supplementary material for: Effectiveness of adjuvant systemic chemotherapy for intermediate-risk stage IB cervical cancer
Source: PubMed Central journal article supplement (PMC5739780; doi:10.18632/oncotarget.22437), 2017-11-15
Supplement: oncotarget-08-106866-s001.pdf [file oncotarget-08-106866-s001.pdf]

## Effectiveness of adjuvant systemic chemotherapy for intermediate-risk stage IB cervical cancer

### SUPPLEMENTARY MATERIALS

**Supplementary Table 1: Treatment types in the Chemotherapy group (*n* = 223)**

| Characteristic                                     | Number | Percent |
|----------------------------------------------------|--------|---------|
| <b>Chemotherapy regimen</b>                        |        |         |
| Carboplatin + paclitaxel                           | 70     | 31.4    |
| Cisplatin + paclitaxel                             | 33     | 14.8    |
| Nedaplatin + irinotecan                            | 25     | 11.2    |
| Cisplatin + irinotecan                             | 14     | 6.3     |
| Carboplatin + docetaxel                            | 13     | 5.8     |
| Cisplatin + etoposide + mitomycin C                | 9      | 4.0     |
| Cisplatin + bleomycin + vincristine + mitomycin C  | 8      | 3.6     |
| Fluorouracil                                       | 7      | 3.1     |
| Nedaplatin + ifosfamide                            | 5      | 2.2     |
| Nedaplatin alone                                   | 4      | 1.8     |
| Carboplatin + paclitaxel + pirarubicin             | 3      | 1.3     |
| Cisplatin + fluorouracil                           | 3      | 1.3     |
| Irinotecan + mitomycin C                           | 3      | 1.3     |
| Cisplatin + doxorubicin + cyclophosphamide         | 3      | 1.3     |
| Nedaplatin + ifosfamide + peplomycin               | 3      | 1.3     |
| Cisplatin + mitomycin C + peplomycin + vincristine | 3      | 1.3     |
| Nedaplatin + ifosfamide + bleomycin                | 2      | 0.9     |
| Cisplatin + ifosfamide + epirubicin                | 2      | 0.9     |
| Other regimens                                     | 13     | 5.8     |
| <b>Chemotherapy cycle</b>                          |        |         |
| 1–2                                                | 15     | 6.7     |
| 3–4                                                | 105    | 47.1    |
| 5–6                                                | 91     | 40.8    |
| > 6                                                | 2      | 0.9     |
| n/a                                                | 10     | 4.5     |
| <b>Chemotherapy interval</b>                       |        |         |
| 3 weeks                                            | 73     | 32.7    |
| 4 weeks                                            | 138    | 61.9    |
| n/a                                                | 12     | 5.4     |
| <b>Chemotherapy delay</b>                          |        |         |
| No                                                 | 170    | 76.2    |
| Yes                                                | 37*    | 16.6    |
| n/a                                                | 16     | 7.2     |
| <b>Chemotherapy discontinuation</b>                |        |         |
| No                                                 | 171    | 76.7    |
| Yes                                                | 23     | 10.3    |
| n/a                                                | 29     | 13.0    |

**Supplementary Table 2: Treatment types in the CCRT group (*n* = 172)**

| <b>Characteristic</b>       | <b>Number</b> | <b>Percent</b> |
|-----------------------------|---------------|----------------|
| <b>Radiosensitizer type</b> |               |                |
| Cisplatin                   | 88            | 51.2           |
| Nedaplatin                  | 54            | 31.4           |
| Fluorouracil                | 5             | 2.9            |
| Cisplatin + fluorouracil    | 3             | 1.7            |
| Others                      | 6             | 3.5            |
| n/a                         | 16            | 9.3            |
| <b>Radiation dose (Gy)</b>  |               |                |
| 50.0                        | 59            | 34.3           |
| 50.4                        | 42            | 24.4           |
| 45.0                        | 30            | 17.4           |
| 46.0                        | 22            | 12.8           |
| 48.6                        | 4             | 2.3            |
| 51.0                        | 4             | 2.3            |
| 44.0                        | 1             | 0.6            |
| 45.8                        | 1             | 0.6            |
| 46.8                        | 1             | 0.6            |
| 50.6                        | 1             | 0.6            |
| n/a                         | 7             | 4.1            |

**Supplementary Table 3: Patient demographics after propensity score matching**

| Characteristics       | CCRT          | Chemotherapy  | P-value |
|-----------------------|---------------|---------------|---------|
| No.                   | <i>n</i> = 99 | <i>n</i> = 99 |         |
| Year                  |               |               | 0.97    |
| 2004                  | 14 (14.1%)    | 14 (14.1%)    |         |
| 2005                  | 15 (15.2%)    | 18 (18.2%)    |         |
| 2006                  | 23 (23.2%)    | 20 (20.2%)    |         |
| 2007                  | 27 (27.3%)    | 28 (28.3%)    |         |
| 2008                  | 20 (20.2%)    | 19 (19.2%)    |         |
| Age (mean ±SD)        | 45.0 (±10.4)  | 45.9 (±10.7)  | 0.54    |
| Stage                 |               |               | 0.99    |
| IB1                   | 77 (77.8%)    | 78 (78.8%)    |         |
| IB2                   | 22 (22.2%)    | 21 (21.2%)    |         |
| Histology             |               |               | 0.89    |
| Squamous              | 66 (66.7%)    | 63 (63.6%)    |         |
| Adenocarcinoma        | 25 (25.3%)    | 28 (28.3%)    |         |
| Adenosquamous         | 8 (8.1%)      | 8 (8.1%)      |         |
| Deep stromal invasion |               |               | 0.99    |
| No                    | 27 (27.3%)    | 27 (27.3%)    |         |
| Yes                   | 72 (72.7%)    | 72 (72.7%)    |         |
| Tumor size            |               |               | 0.61    |
| ≤ 4.0 cm              | 75 (75.8%)    | 79 (79.8%)    |         |
| > 4.0 cm              | 24 (24.2%)    | 20 (20.2%)    |         |
| LVSI                  |               |               | 0.60    |
| Not present           | 23 (23.2%)    | 19 (19.2%)    |         |
| Present               | 76 (76.8%)    | 80 (80.8%)    |         |
| Sampled lymph nodes   |               |               |         |
| Pelvic (median IQR)   | 29.5 (18)     | 28 (17)       | 0.93    |

Mean (± SD), median (interquartile range), or number (%) per column are shown. Student *t* test, Fisher exact test, chi-square test, or Mann-Whitney *U* test for *P*-values. Abbreviations: CCRT, concurrent chemoradiotherapy; and LVSI, lympho-vascular space invasion.
